# Supplementary material for: Widely targeted metabolomics and SPME-GC-MS analysis revealed the quality characteristics of non-volatile/volatile compounds in Zheng’an Bai tea
Source: Front Nutr. 2024 Nov 25;11:1484257. doi: 10.3389/fnut.2024.1484257 (PMC11625558; doi:10.3389/fnut.2024.1484257)
Supplement: Supplementary file 7 [file Table_3.xls]

## Sheet: Sheet1
Table S3 Relative content of volatile metabolites (ng/g)
CAS	Name	Molecular formula	BUD	FBFL	FL	SL	TF3h	TF6h	SQ	DRY
106-26-3	(Z)-3,7-dimethylocta-2,6-dienal	C10H16O	690.4±180.38	454.81±51.02	455.79±70.48	544.5±115.9	907.21±75.74	834.53±150.09	ND	ND
141-27-5	Trans-citral	C10H16O	874.57±143.84	582.77±28.69	711.25±108.84	529.72±63.16	1232.09±76.65	1192.67±166.65	ND	ND
3681-82-1	Trans-3-hexenyl acetate	C8H14O2	ND	35.63±9.4	ND	ND	ND	ND	ND	ND
39028-58-5	(E)-linalool oxide	C10H18O2	2935.79±744.64	4639.23±378.61	2805.28±719.9	454.4±69.96	9892.21±648.06	11546.81±1003.21	707.31±62	633.46±42.32
53398-84-8	(E)-hex-3-enyl butyrate	C10H18O2	254.95±62.62	ND	ND	ND	233.56±8.34	847.13±40.83	173.3±8.7	111.24±15.09
56797-40-1	Ai3-35586	C16H30O	ND	ND	ND	ND	ND	ND	10.8±4.1	17.93±4.71
56554-64-4	1,1-Didodecoxyhexadecane	C40H82O2	43.06±20.91	ND	26.93±8.49	ND	ND	39.08±13	6.38±4.86	4.78±0.66
4435-50-1	1,2,3-Butanetriol	C4H10O3	ND	ND	ND	ND	ND	ND	5.64±1.75	3.29±0.75
5129-66-8	Methyl 12-methyltetradecanoate	C16H32O2	55.57±18.26	ND	34.94±12.11	ND	63.8±22.07	34.74±6.09	ND	ND
616-25-1	1-Penten-3-ol	C5H10O	86.26±19.91	70.49±10.44	ND	63.49±1.47	ND	118.52±33.92	ND	ND
3391-86-4	1-Octen-3-ol	C8H16O	67.25±14.71	43.08±5.01	ND	66.53±9.77	ND	46.26±4.22	12.5±2.43	9.82±2.37
6846-50-0	2,2,4-Trimethyl-1,3-pentanediol diisobutyrate	C16H30O4	ND	256.8±34.17	105.7±34.72	ND	222.76±34.51	ND	ND	56.75±4.65
17312-44-6	2,3-Dimethyldecane	C12H26	ND	ND	80.76±56.46	ND	160.3±38.66	ND	15.04±0.36	20.33±1.54
2613-61-8	2,4,6-Trimethyl heptane	C10H22	764.01±82.42	669.94±30.97	ND	ND	ND	ND	ND	ND
17312-80-0	2,4－Dimethyl-undecane	C13H28	ND	ND	ND	ND	ND	330.51±67.76	ND	ND
18344-37-1	2,6,10,14-Tetramethylheptadecane	C21H44	244.51±13.51	132.91±21.03	96.98±11.72	282.97±45.69	200.49±13.34	241.88±45.2	151.28±20.17	161.07±14.93
54833-48-6	Heptadecane,2,6,10,15-tetr	C21H44	140.97±45.43	135.85±24.92	36.04±10.37	59.94±30.97	139.71±7.24	77.22±17.71	67.06±40.25	32.14±8.56
3891-98-3	2,6,10-Trimethyldodecane	C15H32	ND	317.55±134.23	63.74±23.37	ND	212.51±16.18	408±124.76	106.27±31.92	26.44±4.99
14905-56-7	2,6,10-Trimethyltetradecane	C17H36	35.56±19.06	47.08±8.89	22.24±3.98	38.68±6.24	55.07±1.43	29.33±0.55	5.25±1.84	18.19±2.59
31295-56-4	2,6,11-Trimethyldodecane	C15H32	221.83±26.6	296.97±256.08	771.03±116.99	269.27±214.68	643.05±199.92	1411.62±177.1	78.3±8.36	217.95±77.98
17301-23-4	2,6-Dimethylundecane	C13H28	729.35±46.38	793.57±77.8	500.87±48.18	823.64±124.76	1119.23±281.32	670.23±144.06	214.2±36.61	147.16±9.07
22410-74-8	2,7-Dimethyl-2,6-octadien-1-ol	C10H18O	ND	41.64±4.56	ND	ND	ND	ND	ND	48±7.61
10042-59-8	2-Propyl-1-heptanol	C10H22O	218.56±150.16	87.65±16.31	ND	191.51±126.67	ND	142.23±14.92	ND	20.93±3.13
2425-77-6	2-Hexyl-1-decanol	C16H34O	ND	ND	ND	ND	53.07±14.85	83.03±10.54	ND	ND
137-32-6	2-Methyl-1-butanol	C5H12O	ND	49.03±15.29	ND	ND	ND	ND	ND	ND
2490-48-4	1-Hexadecanol,2-methyl-	C17H36O	ND	ND	23.06±4.24	ND	32.95±4.48	29.74±8.38	5.48±0.91	5.06±0.55
96-17-3	2-Methylbutyraldehyde	C5H10O	ND	ND	ND	ND	ND	153.52±19	5.97±2.65	35.41±8.4
6975-98-0	2-Methyldecane	C11H24	ND	ND	ND	ND	ND	ND	61±13.1	39.34±3.4
871-83-0	2-Methylnonane	C10H22	58.66±11.13	ND	14.04±4.29	ND	93.81±3.66	72.08±23.19	5.62±0.96	ND
7045-71-8	2-Methylundecane	C12H26	300.92±1.59	267.82±35.09	178.84±13.22	303.67±43.83	327.61±35	336.72±53.39	66.5±7.38	61.19±3.01
2177-77-7	Methyl 2-methylpentanoate	C7H14O2	2151.4±348.05	2538.04±1078.43	1214.56±562.9	2133.09±615.89	1231.04±166.89	1140.27±120.74	1125.46±351.24	1339.05±502.59
30086-02-3	3,5-Octadien-2-one	C8H12O	362.96±93.81	ND	188.32±41.33	ND	ND	513.2±33.87	ND	ND
6750-34-1	3,7,11-Trimethyl-1-dodecanol	C15H32O	ND	ND	ND	ND	ND	ND	ND	22.92±24.77
17312-54-8	3,7-Dimethyldecane	C12H26	378.33±38.26	ND	728.6±206.39	718.62±301.49	1431.88±164.19	1119.29±249.51	504.95±50.24	343.35±33.41
544-12-7	Trans-3-hexen-1-ol	C6H12O	ND	ND	35.83±9.79	ND	275.93±31.47	ND	ND	ND
55282-12-7	3-ethyl-5-(2-ethylbutyl)octadecane	C26H54	82.63±39.13	37.8±3.35	21.97±1.8	44.82±22.77	ND	96.1±30.43	19.97±4.51	4.73±0.77
2847-72-5	4-Methyldecane	C11H24	302.51±4.63	94.37±11	122.16±27.1	453.08±426.4	495.91±25.86	306.65±46.17	41.37±4.71	32.93±9.25
6117-97-1	4-Methyldodecane	C13H28	ND	ND	ND	ND	ND	ND	88.83±16.76	76.9±6.35
13151-35-4	5-Methyldecane	C11H24	53.78±26	ND	ND	92.47±39.01	ND	96.37±28.47	ND	9.14±2.5
10544-96-4	6-Methyloctadecane	C19H40	78.19±14.43	37.42±2.96	69.41±6.52	32.65±10.38	83.35±5.33	52.1±7.29	7.19±0.45	13.43±1.12
79-77-6	β-ionone	C13H20O	172.3±65.44	113.18±37.69	100.21±31.01	196.22±14.51	128.18±51.95	206.37±5.1	51.82±4.53	27.5±9.83
2314-78-5	N-ethylsuccinimide	C6H9NO2	272.27±96.64	243.15±40.24	89.35±27.03	282.66±79.71	156.59±14.55	ND	ND	ND
100-51-6	Benzyl alcohol	C7H8O	4738.11±1351.84	67.52±21.67	1276.83±351.33	10859.48±1098.67	4448.99±1410.21	1697.15±1045.39	22.14±6.05	33.9±2.19
100-52-7	Benzaldehyde	C7H6O	69.89±34.3	63.58±8.72	37.9±28.83	97.46±14.23	145.22±10.64	136.01±9.37	ND	ND
107-98-2	1-Methoxy-2-propanol	C4H10O2	ND	96.21±14.85	84.19±22.18	85.19±28.24	235.94±9.18	149.66±42.26	ND	ND
3879-26-3	Nerylacetone	C13H22O	370.66±237.71	102.84±15.54	66.38±7.59	120.68±6.57	126.27±6.13	109.75±5.55	69.68±6.31	36.98±6.91
619-01-2	Dihydrocarveol	C10H18O	223.37±31.63	192.71±53.3	ND	ND	ND	ND	ND	ND
6728-26-3	Trans-2-hexenal	C6H10O	130.72±36.67	205.45±27.96	65.77±1.59	102.47±21.84	196.54±37.9	74.94±3.34	ND	ND
31502-14-4	Trans-2-nonen-1-ol	C9H18O	119.86±24.83	122.95±33.2	70.22±18.65	ND	ND	137.95±42.87	ND	ND
34995-77-2	Tetrahydro-alpha,alpha,5-trimethyl-5-vinylfuran-2-methanol	C10H18O2	14876.63±6232.21	28631.83±3109.09	2074.37±1479.85	16601.03±451.69	20440.12±298.15	25816.56±2861.09	190.91±91.61	171.81±6.34
18409-18-2	Trans-2-decen-1-ol	C10H20O	ND	ND	ND	ND	ND	ND	ND	12.84±2.71
928-95-0	Trans-2-hexen-1-ol	C6H12O	349.59±81.4	692.11±100.5	16.2±10.39	295.35±18.93	ND	46.27±16.64	ND	ND
7212-44-4	Nerolidol	C15H26O	ND	ND	ND	ND	ND	ND	ND	12.79±8.23
40716-66-3	Trans-nerolidol	C15H26O	143.06±23.7	103.36±29.49	58.9±10.91	261.39±115.89	481.22±35.13	ND	ND	ND
2566-97-4	Linolelaidic acid methyl ester	C19H34O2	ND	26.46±7.22	ND	ND	ND	ND	ND	ND
78-70-6	Linalool	C10H18O	21137.78±3584.96	35980.29±3170.9	14015.59±447.76	17544.19±762.97	25559.82±2922.64	37675.56±4212.29	365.84±94.39	537.89±42.46
17865-32-6	Cyclohexyldimethoxymethylsilane	C9H20O2Si	ND	ND	ND	ND	ND	ND	42.08±2.6	58.59±0.42
25779-85-5	11-(Cyclopentan-1-yl)undecanoic acid methyl ester	C17H32O2	62.17±34.66	59.55±39.93	ND	67.4±5.64	ND	2565.33±906.84	ND	ND
6378-65-0	Hexyl hexanoate	C12H24O2	ND	ND	ND	ND	ND	ND	86.96±10.21	59.38±1.51
106-70-7	Methyl hexanoate	C7H14O2	122.5±20.38	90.09±2.67	13±2.26	223.39±45.25	178.07±37.74	154.28±13.14	6.87±1.14	7.51±0.42
31501-11-8	Cis-3-hexenyl hexanoate	C12H22O2	98.99±8.57	41.81±9.27	ND	81.04±16.04	157.31±3.08	469.49±31.09	2127.76±87.47	1514.07±37.91
110-93-0	6-Methyl-5-hepten-2-one	C8H14O	553.46±170.87	509.75±72.31	147.89±26.79	295.57±19.31	564.93±112.43	720.49±78.64	ND	ND
84-74-2	Dibutyl phthalate	C16H22O4	125.22±48.24	822.74±670.3	159.5±37.3	403.26±152.14	333.05±98.09	376.85±50.56	83.48±79.19	151.44±195.62
117-81-7	Bis(2-ethylhexyl) phthalate	C24H38O4	131.89±110.06	ND	ND	ND	ND	40.49±11.35	11.12±3.18	ND
84-69-5	Diisobutyl phthalate	C16H22O4	848.12±417.92	ND	228.12±130.04	287.3±52.53	307.55±84.81	ND	156.09±44.58	102.41±13.38
1731-84-6	Methyl nonanoate	C10H20O2	2738.25±385.69	ND	1218.26±140.26	2856.7±373.35	2797.61±211.17	3225.67±1281.5	ND	ND
124-10-7	Methyl myristate	C15H30O2	865.85±110.06	431.11±74.89	322.37±18.3	1467.72±135.42	1515.01±412.14	466.67±71.28	10.68±1.34	ND
3789-85-3	Trimethylsilyl trimethylsiloxy salicylate	C13H22O3Si2	930.1±98.57	ND	ND	644.91±173.36	ND	ND	ND	ND
930-02-9	Octadecyl vinyl ether	C20H40O	42.35±25.46	74.62±13.93	14.85±3.44	44.8±8.58	ND	43.05±3.55	5.92±1.28	7.04±1.82
119-36-8	Methyl salicylate	C8H8O3	7180.46±933.22	5478.98±359.52	2462.58±387.51	6444.94±169.47	4966.07±1291.61	4432.71±421.01	139.85±20.17	94.98±9.98
61444-38-0	Cis3-hexenyl cis-3-hexenoate	C12H20O2	ND	ND	ND	ND	ND	ND	106.76±1.3	73.25±2.93
488-10-8	Jasmone	C11H16O	253.59±16.09	232.76±35.8	79.68±3.23	509.34±59.39	1594.17±169.93	553.54±71.06	314.72±73.31	222.91±59.99
53398-85-9	Cis-3-hexenyl 2-methylbutanoate	C11H20O2	ND	ND	ND	ND	ND	959.97±117.19	149.03±20.31	122.82±6.92
1845-30-3	Cis-verbenol	C10H16O	113.58±75.03	127.31±10.66	38.97±5.56	ND	94.14±45.56	135.14±39.62	ND	ND
106-24-1	Geraniol	C10H18O	111449.66±8145.18	121945.92±24023.74	46419.5±19833.3	81897.55±6441.61	100706.46±5819.05	112042.14±24242.76	2087.08±227.84	1550.28±117.12
3796-70-1	Geranylacetone	C13H22O	173.31±84.08	ND	ND	ND	ND	ND	ND	ND
1189-09-9	Methyl geranate	C11H18O2	581.52±370.39	ND	234.67±37.29	624.11±95.29	710.48±87.51	634.96±95.14	244.15±34.03	ND
111-11-5	Caprylic acid methyl ester	C9H18O2	235.1±42.89	165.86±24.85	127.41±9.96	401.58±47	297.71±5.92	285.37±13.25	14.34±2.36	15.11±5.54
301-00-8	Methyl linolenate	C19H32O2	6954.63±277.75	1644.25±1697.08	604.77±215.1	5706.69±1977.45	8263.21±2865.93	2863.59±434.02	104.45±56.58	ND
112-63-0	Methyl linoleate	C19H34O2	3107.51±81.23	2213.45±2091.66	255.41±72.28	3081.67±970	4521.97±2020.17	1296.73±903.42	ND	ND
928-96-1	Leaf alcohol	C6H12O	407.89±86.53	550.52±71.67	ND	352.47±22.98	ND	395.26±131	ND	ND
3681-71-8	Cis-3-hexenyl acetate	C8H14O2	300.02±185.48	ND	ND	ND	ND	ND	ND	ND
590-86-3	Isovaleraldehyde	C5H10O	28.56±5.51	44.4±8.64	ND	60.27±12.65	68.95±9.22	186.65±28.69	17.87±5.71	25.01±1.08
112-62-9	Methyl oleate	C19H36O2	83.44±7.99	106.57±65.99	34.88±19.97	82.3±10.65	79.75±12.95	37.31±1.8	ND	ND
111-82-0	Methyl laurate	C13H26O2	442.1±41.67	205.95±27.57	146.81±15.49	701.79±43.93	746.81±54.92	446.02±175.63	ND	ND
111-70-6	1-Heptanol	C7H16O	134.25±33.94	286.3±71.62	58.66±9.77	219.13±17.47	257.42±66.24	280.09±28.58	ND	ND
111-71-7	Heptaldehyde	C7H14O	184.6±18.4	135.46±24.48	43.36±11.12	123.04±17.82	188.62±50.97	187.53±20.13	15.59±4.42	23.54±1.79
124-18-5	Decane	C10H22	437.26±22.31	157.32±105.44	213.47±76.83	400.72±187.72	220.69±102.16	382.63±50.27	39.11±4.46	57.99±7.29
111-27-3	1-Hexanol	C6H14O	437.14±85.94	641.71±82.2	36.44±8.24	476.91±104.8	266.64±87.59	360.87±28.4	10.38±4.75	5.43±0.91
66-25-1	Hexanal	C6H12O	148.53±21.22	64.58±11.82	36.67±9.31	94.42±33.55	100.29±33.88	134.73±13.99	6.15±1.37	13.42±0.71
124-19-6	1-Nonanal	C9H18O	554.71±48.19	910.01±151.05	274.07±25.47	586.32±115.4	1169.86±97.05	1266.91±232.26	277.6±79.96	129.39±34.6
71-41-0	1-Pentanol	C5H12O	82.23±61.4	61.56±24.69	23.44±11.21	135.25±25.39	ND	71.63±13.39	7.4±0.99	16.58±1.67
110-62-3	Valeraldehyde	C5H10O	115.45±29.07	78±12.14	18.99±4.86	78.17±12.98	ND	124.33±42.11	58.12±50.27	23.26±3.06
111-87-5	1-Octanol	C8H18O	ND	242.26±136.32	ND	683.8±121.56	ND	170.09±69.33	216.34±61.78	30.59±12.63
124-13-0	Octanal	C8H16O	67.39±48.3	34.55±8.06	ND	55.36±5.65	ND	51.18±2.42	4.61±1.03	10.34±1.84
112-39-0	Methyl palmitate	C17H34O2	16599.57±1856.65	624.93±182.11	4698.26±182.58	14218.81±3646.59	20420.21±4093.62	8082.74±523.35	385.6±83.83	122.09±20.57
628-97-7	Palmitic acid ethyl ester	C18H36O2	92.25±44.04	78.34±6.07	22.42±9.84	35.37±4.89	60.3±23.84	30.42±3.38	11.55±0.36	8.79±0.78
